# Supplementary material for: Pathogenicity of Phytophthora× alni Isolates Obtained from Symptomatic Trees, Soil and Water against Alder
Source: MDPI journal article supplement (doi:10.3390/f13010020), 2021-12-23
Supplement: s1 [file s1]

## Supplementary material for:

Pathogenicity of *Phytophthora*  $\times$  *alni* isolates obtained from symptomatic trees, soil and water

Aleksandra Trzewik <sup>1,\*</sup>, Robert Maciorowski <sup>1</sup> and Teresa Orlikowska <sup>1</sup>

<sup>1</sup> The National Institute of Horticultural Research; Konstytucji 3 Maja 1/3 Str., 96-100 Skierniewice, Poland;

teresa.orlikowska@inhort.pl (T.O);

robert.maciorowski@inhort.pl (R.M);

aleksandra.trzewik@inhort.pl (A.T);

\*Correspondence: aleksandra.trzewik@inhort.pl

## Contents

### Tables

**Table S1.** Colonization of shoots 2-year-old seedlings of *Alnus glutinosa* inoculated on shoots with *Phytophthora*  $\times$  *alni* (n=15). Darkened fields indicate dead plants.

**Table S2.** Colonization of *Alnus glutinosa* shoots planted as 2-year-old seedlings in a substrate infected with *Phytophthora*  $\times$  *alni* (n=12). Darkened fields indicate dead plants.

**Table S3.** Re-isolation of *Phytophthora*  $\times$  *alni* species in greenhouse experiments.

**Table S1.** Colonization of shoots 2-year-old seedlings of *Alnus glutinosa* inoculated on shoots with *Phytophthora*  $\times$  *alni* (n=15). Darkened fields indicate dead plants

| Isolate number   | Length of necrosis on shoots (cm $\pm$ SD) |                                 |                                 |                     |
|------------------|--------------------------------------------|---------------------------------|---------------------------------|---------------------|
|                  | After 1 month                              | After 4 months                  | After 11 months                 | After 15 months     |
| Negative control | 0,0 <sup>1</sup> a                         | 0,0 a                           | 0,0 a                           | 0,0 a               |
| PAA1             | 6,6 e-h $\pm$ 1,72                         | 20,7 f-j $\pm$ 4,49             | 31,0 ij $\pm$ 7,90 <sup>2</sup> | —                   |
| PAA2             | 6,9 e-h $\pm$ 1,88                         | 23,9 h-j $\pm$ 3,01             | 33,2 j $\pm$ 3,30 <sup>2</sup>  | —                   |
| PAA3             | 5,3 b-g $\pm$ 1,31                         | 18,1 e-g $\pm$ 3,55             | 24,1 f-h $\pm$ 2,98             | 31,6 g $\pm$ 3,50   |
| PAA4             | 6,3 d-h $\pm$ 1,91                         | 18,6 e-h $\pm$ 2,71             | 25,6 gh $\pm$ 5,05              | 28,8 fg $\pm$ 4,20  |
| PAA5             | 6,7 e-h $\pm$ 1,39                         | 30,4 kl $\pm$ 7,42 <sup>2</sup> | —                               | —                   |
| PAA6             | 7,0 f-h $\pm$ 1,58                         | 21,9 g-j $\pm$ 4,02             | 25,2 gh $\pm$ 4,43              | 28,2 e-g $\pm$ 5,19 |
| PAA7             | 5,8 c-g $\pm$ 1,92                         | 25,6 jk $\pm$ 2,61              | 33,8 j $\pm$ 3,63 <sup>2</sup>  | —                   |
| PAA8             | 6,6 e-h $\pm$ 2,29                         | 19,5 e-h $\pm$ 2,29             | 23,6 f-h $\pm$ 2,50             | 27,2 ef $\pm$ 3,53  |
| PAA9             | 6,9 e-h $\pm$ 2,06                         | 25,3 i-k $\pm$ 2,94             | 32,2 j $\pm$ 5,63 <sup>2</sup>  | —                   |
| PAA10            | 5,2 b-g $\pm$ 1,83                         | 15,4 d-f $\pm$ 4,91             | 20,6 ef $\pm$ 3,10              | 24,4 de $\pm$ 3,20  |
| PAA11            | 5,9 c-h $\pm$ 3,33                         | 30,7 kl $\pm$ 7,71 <sup>2</sup> | —                               | —                   |
| PAA12            | 7,5 gh $\pm$ 2,29                          | 23,9 h-j $\pm$ 3,09             | 27,4 hi $\pm$ 2,23              | 31,6 g $\pm$ 2,40   |
| PAA13            | 7,5 f-h $\pm$ 2,16                         | 19,9 e-i $\pm$ 4,89             | 24,3 f-h $\pm$ 4,22             | 31,2 g $\pm$ 5,63   |
| PAA14            | 7,7 gh $\pm$ 1,58                          | 31,1 l $\pm$ 10,12 <sup>2</sup> | —                               | —                   |
| PAA15            | 42,2 j $\pm$ 4,31 <sup>2</sup>             | —                               | —                               | —                   |

|               |                             |                            |                 |                 |
|---------------|-----------------------------|----------------------------|-----------------|-----------------|
| PAA16         | 39,0 i ± 4,30 <sup>2</sup>  | —                          | —               | —               |
| PAA17         | 38,2 i ± 1,96 <sup>2</sup>  | —                          | —               | —               |
| PAA18         | 39,0 i ± 2,33 <sup>2</sup>  | —                          | —               | —               |
| PAA19         | 3,5 b-d ± 0,73              | 8,9 bc ± 2,07              | 13,5 c ± 1,23   | 16,1 c ± 1,88   |
| PAA20         | 3,9 b-e ± 0,89              | 12,6 cd ± 3,05             | 15,0 cd ± 2,73  | 18,5 c ± 2,69   |
| PAA21         | 4,4 b-f ± 1,66              | 19,1 e-h ± 3,81            | 23,0 e-g ± 2,82 | 25,4 d-f ± 2,72 |
| PAA22         | 3,5 b-d ± 1,05              | 14,5 de ± 3,39             | 18,9 de ± 5,30  | 22,4 d ± 5,12   |
| PAA23         | 3,0 a-c ± 1,00              | 6,2 b ± 1,33               | 7,6 b ± 1,15    | 10,5 b ± 1,22   |
| PAA24         | 2,5 ab ± 0,71               | 6,6 b ± 2,00               | 8,9 b ± 1,79    | 11,9 b ± 1,74   |
| PAA25         | 2,6 ab ± 0,55               | 6,8 b ± 2,36               | 9,0 b ± 2,11    | 11,1 b ± 2,43   |
| PAA26         | 37,7 i ± 4,02 <sup>2</sup>  | —                          | —               | —               |
| PAA27         | 40,0 ij ± 5,77 <sup>2</sup> | —                          | —               | —               |
| PAA28         | 0,0 a                       | 0,0 a                      | 0,0 a           | 0,0 a           |
| CBS<br>117375 | 8,9 h ± 1,61                | 33,7 i ± 7,84 <sup>2</sup> | —               | —               |

<sup>1</sup> means in the columns, followed by the same letter, were not significantly different using Tukey HSD test at p=0.05,

<sup>2</sup> plants whose main shoot died were not taken for statistical analysis in the following months

**Table S2.** Colonization of *Alnus glutinosa* shoots planted as 2-year-old seedlings in a substrate infected with *Phytophthora ×alni* (n=12). Darkened fields indicate dead plants.

| Isolate number     | Length of necrosis on shoots (cm ± SD) |                            |                 |                 |
|--------------------|----------------------------------------|----------------------------|-----------------|-----------------|
|                    | After 1 month                          | After 4 months             | After 11 months | After 15 months |
| Kontrola negatywna | 0,0 <sup>1</sup> a                     | 0,0 a                      | 0,0 a           | 0,0 a           |
| PAA1               | 14,2 h-i ± 4,21                        | 21,8 cd ± 11,45            | 25,7 e ± 10,20  | 29,8 d-f ± 9,02 |
| PAA2               | 11,3 f-i ± 6,26                        | 17,0 b-d ± 6,21            | 21,3 cd ± 6,06  | 26,1 c-f ± 6,25 |
| PAA3               | 11,2 f-i ± 2,23                        | 17,4 b-d ± 2,26            | 22,5 cd ± 2,27  | 28,1 c-f ± 2,35 |
| PAA4               | 7,8 d-f ± 2,29                         | 14,3 b ± 2,21              | 18,2 c ± 2,40   | 23,2 c ± 2,70   |
| PAA5               | 8,5 fg ± 5,20                          | 16,3 b-d ± 5,41            | 20,7 cd ± 5,82  | 25,8 c-f ± 6,02 |
| PAA6               | 11,8 f-i ± 2,80                        | 18,4 b-d ± 2,20            | 22,4 cd ± 2,24  | 28,0 c-f ± 2,22 |
| PAA7               | 9,1 f-h ± 2,46                         | 15,6 b-d ± 5,04            | 20,8 cd ± 4,99  | 25,5 c-f ± 5,17 |
| PAA8               | 8,1 e-g ± 4,08                         | 15,1 bc ± 4,58             | 19,5 cd ± 4,85  | 24,4 cd ± 5,76  |
| PAA9               | 7,4 b-e ± 4,46                         | 13,2 b ± 4,56              | 17,8 c ± 4,68   | 22,3 c ± 4,48   |
| PAA10              | 10,2 f-i ± 5,65                        | 17,4 b-d ± 5,81            | 21,3 cd ± 5,45  | 26,5 c-f ± 5,66 |
| PAA11              | 7,3 b-e ± 3,90                         | 13,1 b ± 5,11              | 18,0 c ± 5,45   | 23,0 c ± 5,52   |
| PAA12              | 7,6 c-e ± 4,06                         | 13,5 b ± 3,98              | 18,1 c ± 3,72   | 23,9 c ± 4,04   |
| PAA13              | 7,3 b-e ± 4,77                         | 13,5 b ± 4,86              | 19,0 cd ± 5,29  | 24,6 c-e ± 4,94 |
| PAA14              | 15,3 i ± 2,70                          | 22,0 d ± 2,54              | 26,6 e ± 2,27   | 31,0 f ± 2,15   |
| PAA15              | 28,3 j-l ± 6,12                        | 45,6 f ± 7,41 <sup>2</sup> | —               | —               |
| PAA16              | 30,0 j-l ± 5,34                        | 47,4 f ± 4,58 <sup>2</sup> | —               | —               |
| PAA17              | 31,3 l ± 3,47                          | 48,3 f ± 3,78 <sup>2</sup> | —               | —               |
| PAA18              | 30,2 kl ± 6,19                         | 46,8 f ± 5,55 <sup>2</sup> | —               | —               |
| PAA19              | 1,9 ab ± 1,31                          | 5,2 a ± 1,34               | 8,3 b ± 1,35    | 11,3 b ± 1,37   |
| PAA20              | 2,3 a-c ± 1,88                         | 5,2 a ± 1,88               | 8,0 b ± 2,45    | 11,0 b ± 3,02   |
| PAA21              | 2,1 ab ± 2,27                          | 4,7 a ± 3,41               | 6,9 b ± 3,54    | 9,7 b ± 4,09    |
| PAA22              | 2,5 a-d ± 1,88                         | 5,8 a ± 2,00               | 8,5 b ± 1,97    | 11,5 b ± 1,76   |
| PAA23              | 2,9 a-e ± 2,16                         | 6,2 a ± 2,60               | 8,9 b ± 2,76    | 11,5 b ± 3,18   |
| PAA24              | 1,4 a ± 1,40                           | 4,1 a ± 1,99               | 7,0 b ± 2,24    | 9,4 b ± 2,51    |
| PAA25              | 2,2 a-c ± 1,37                         | 5,0 a ± 1,80               | 7,7 b ± 1,51    | 11,0 b ± 1,25   |
| PAA26              | 24,7 i ± 4,05                          | 37,5 e ± 4,83 <sup>2</sup> | —               | —               |
| PAA27              | 24,9 jk ± 3,60                         | 35,3 e ± 5,75 <sup>2</sup> | —               | —               |
| PAA28              | 15,0 i ± 3,26                          | 21,2 cd ± 3,24             | 26,0 e ± 3,30   | 30,4 ef ± 3,14  |
| CBS 117375         | 13,5 g-i ± 1,57                        | 19,5 b-d ± 2,94            | 24,3 d ± 3,57   | 30,3 ef ± 3,14  |

<sup>1</sup> means in the columns, followed by the same letter, were not significantly different using Tukey HSD test at p=0.05,

<sup>2</sup> plants whose main shoot died were not taken for statistical analysis in the following months

**Table S3.** Re-isolation of *Phytophthora ×alni* species in greenhouse experiments

| Isolate number   | Re-isolation of <i>Phytophthora ×alni</i><br>(shoot inoculation) |       |           | Re-isolation of <i>Phytophthora ×alni</i><br>(substrate infected) |       |           |
|------------------|------------------------------------------------------------------|-------|-----------|-------------------------------------------------------------------|-------|-----------|
|                  | Shoot                                                            | Roots | Substrate | Shoot                                                             | Roots | Substrate |
| Negative control | – <sup>1</sup>                                                   | –     | –         | –                                                                 | –     | –         |
| PAA1             | +                                                                | –     | –         | +                                                                 | +     | +         |
| PAA2             | +                                                                | –     | –         | +                                                                 | +     | +         |
| PAA3             | +                                                                | –     | –         | +                                                                 | +     | +         |
| PAA4             | +                                                                | –     | –         | +                                                                 | +     | +         |
| PAA5             | +                                                                | –     | –         | +                                                                 | +     | +         |
| PAA6             | +                                                                | –     | –         | +                                                                 | +     | +         |
| PAA7             | +                                                                | –     | –         | +                                                                 | +     | +         |
| PAA8             | +                                                                | –     | –         | +                                                                 | +     | +         |
| PAA9             | +                                                                | –     | –         | +                                                                 | +     | +         |
| PAA10            | +                                                                | –     | –         | +                                                                 | +     | +         |
| PAA11            | +                                                                | –     | –         | +                                                                 | +     | +         |
| PAA12            | +                                                                | –     | –         | +                                                                 | +     | +         |
| PAA13            | +                                                                | –     | –         | +                                                                 | +     | +         |
| PAA14            | +                                                                | –     | –         | +                                                                 | +     | +         |
| PAA15            | +                                                                | +     | +         | +                                                                 | +     | +         |
| PAA16            | +                                                                | +     | +         | +                                                                 | +     | +         |
| PAA17            | +                                                                | +     | +         | +                                                                 | +     | +         |
| PAA18            | +                                                                | +     | +         | +                                                                 | +     | +         |
| PAA19            | +                                                                | –     | –         | +                                                                 | +     | +         |
| PAA20            | +                                                                | –     | –         | +                                                                 | +     | +         |
| PAA21            | +                                                                | –     | –         | +                                                                 | +     | +         |
| PAA22            | +                                                                | –     | –         | +                                                                 | +     | +         |
| PAA23            | +                                                                | –     | –         | +                                                                 | +     | +         |
| PAA24            | +                                                                | –     | –         | +                                                                 | +     | +         |
| PAA25            | +                                                                | –     | –         | +                                                                 | +     | +         |
| PAA26            | +                                                                | +     | +         | +                                                                 | +     | +         |
| PAA27            | +                                                                | +     | +         | +                                                                 | +     | +         |
| PAA28            | +                                                                | –     | –         | +                                                                 | +     | +         |
| CBS117375        | +                                                                | –     | –         | +                                                                 | +     | +         |

<sup>1</sup> – no pathogen after re-isolation; + presence of pathogen after re-isolation
